# Supplementary material for: Dabrafenib plus trametinib in patients with BRAF V600E-mutant anaplastic thyroid cancer: updated analysis from the phase II ROAR basket study
Source: PubMed Central journal article supplement — Ann Oncol. Author manuscript; Available in PMC 2022 Jul 30. (PMC9338780; doi:10.1016/j.annonc.2021.12.014), 2022-01-10
Supplement: NIHMS1826018-supplement-1.pdf [file NIHMS1826018-supplement-1.pdf]

**Supplementary Material (online only)**

**Supplement to: Subbiah V, Kreitman RJ, Wainberg ZA, et al. Dabrafenib plus trametinib in patients with *BRAF* V600E–mutant anaplastic thyroid cancer: updated analysis from the phase II ROAR basket study.**

## Supplementary Figure S1. ROAR study design

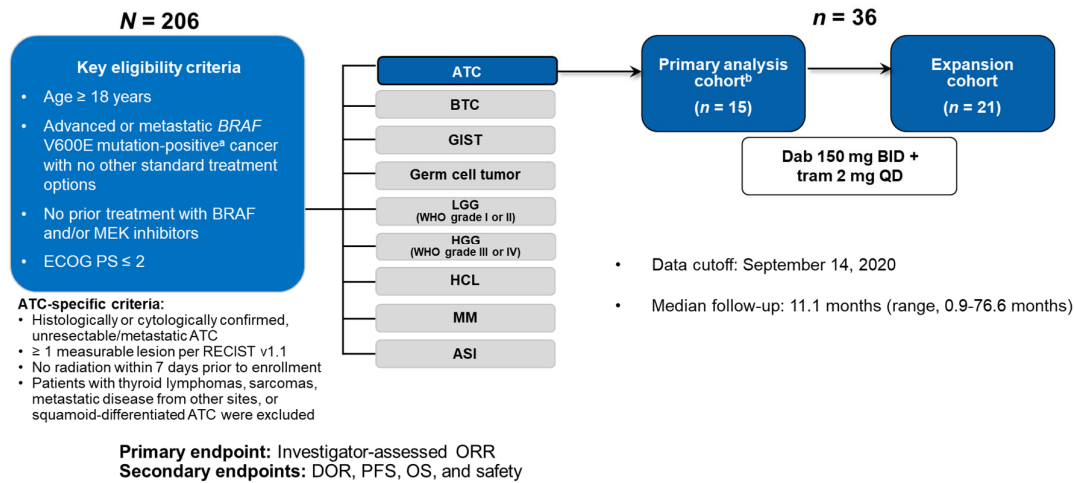

ASI, adenocarcinoma of the small intestine; ATC, anaplastic thyroid cancer; BID, twice daily; BTC, biliary tract cancer; dab, dabrafenib; DOR, duration of response; ECOG PS, Eastern Cooperative Oncology Group performance status; GIST, gastrointestinal stromal tumor; HCL, hairy cell leukemia; HGG, high-grade glioma; LGG, low-grade glioma; MM, multiple myeloma; ORR, overall response rate; OS, overall survival; PFS, progression-free survival; QD, once daily; RECIST v1.1, Response Evaluation Criteria in Solid Tumors version 1.1; ROAR, Rare Oncology Agnostic Research; tram, trametinib; WHO, World Health Organization.

<sup>a</sup> Per local assessment, with retrospective confirmation by central review via the THxID-BRAF kit (bioMérieux, Durham, NC).

<sup>b</sup> In November 2015, the primary analysis cohort was closed early for efficacy, and an expansion cohort was opened.

**Supplementary Table S1.** Serious adverse events

| <b>Serious AEs, n (%)<sup>a</sup></b>          | <b>(n = 36)</b> |
|------------------------------------------------|-----------------|
| <b>Any</b>                                     | <b>20 (56)</b>  |
| Pneumonia                                      | 8 (22)          |
| Pleural effusion                               | 3 (8)           |
| Urinary tract infection                        | 2 (6)           |
| Acute kidney injury                            | 2 (6)           |
| Neutrophil count decreased                     | 2 (6)           |
| Hematochezia                                   | 2 (6)           |
| Leukopenia                                     | 2 (6)           |
| Pyrexia                                        | 1 (3)           |
| Sepsis                                         | 1 (3)           |
| Dehydration                                    | 1 (3)           |
| Fatigue                                        | 1 (3)           |
| Pulmonary embolism                             | 1 (3)           |
| Anemia                                         | 1 (3)           |
| Ejection fraction decreased                    | 1 (3)           |
| Femoral neck fracture                          | 1 (3)           |
| Hematuria                                      | 1 (3)           |
| Hypotension                                    | 1 (3)           |
| Neutropenia                                    | 1 (3)           |
| Wound infection                                | 1 (3)           |
| Aortic thrombosis                              | 1 (3)           |
| Autoimmune hemolytic anemia                    | 1 (3)           |
| Bladder transitional cell carcinoma            | 1 (3)           |
| Cardiac ventricular thrombosis                 | 1 (3)           |
| Clavicle fracture                              | 1 (3)           |
| <i>Clostridium difficile</i> infection         | 1 (3)           |
| Diverticulitis                                 | 1 (3)           |
| Dizziness                                      | 1 (3)           |
| Dysphagia                                      | 1 (3)           |
| Dyspnea                                        | 1 (3)           |
| Facial nerve disorder                          | 1 (3)           |
| Hallucination                                  | 1 (3)           |
| Hyperglycemic hyperosmolar nonketotic syndrome | 1 (3)           |
| Hyponatremia                                   | 1 (3)           |
| Esophageal stenosis                            | 1 (3)           |
| Paralysis recurrent laryngeal nerve            | 1 (3)           |
| Pelvic infection                               | 1 (3)           |
| Pneumonia aspiration                           | 1 (3)           |
| Pneumonia necrotizing                          | 1 (3)           |
| Pulmonary hematoma                             | 1 (3)           |
| Rhabdomyolysis                                 | 1 (3)           |
| Rib fracture                                   | 1 (3)           |
| Staphylococcal infection                       | 1 (3)           |
| Stress cardiomyopathy                          | 1 (3)           |
| Syncope                                        | 1 (3)           |

AE, adverse event; ATC, anaplastic thyroid cancer.

<sup>a</sup> All-cause serious AEs of any grade that occurred in the ATC cohort.

**Supplementary Table S2.** Dabrafenib and trametinib dose intensity and exposure

| Category                                             | <i>(n = 36)</i> |            |
|------------------------------------------------------|-----------------|------------|
|                                                      | Dabrafenib      | Trametinib |
| <b>Duration of exposure, median (range), months</b>  | 7.0 (1-63)      | 7.0 (1-63) |
| <b>Patient status, <i>n</i> (%)</b>                  |                 |            |
| Treatment ongoing                                    | 2 (6)           | 2 (6)      |
| Discontinued                                         | 34 (94)         | 34 (94)    |
| Progressive disease                                  | 22 (61)         | 22 (61)    |
| Adverse event                                        | 6 (17)          | 6 (17)     |
| Patient withdrawal                                   | 6 (17)          | 6 (17)     |
| <b>Daily dose, mean (SD), mg<sup>a</sup></b>         | 252.7 (56.59)   | 1.7 (0.35) |
| <b>Patients with dose reduction, <i>n</i> (%)</b>    | 28 (78)         | 11 (31)    |
| <b>No. of dose reductions, <i>n</i> (%)</b>          |                 |            |
| 1                                                    | 4 (11)          | 7 (19)     |
| 2                                                    | 6 (17)          | 2 (6)      |
| ≥ 3                                                  | 18 (50)         | 2 (6)      |
| <b>Dose reductions, <i>n</i></b>                     | 167             | 19         |
| <b>Reasons for dose reduction, <i>n</i> (%)</b>      |                 |            |
| Adverse events                                       | 39 (23)         | 12 (63)    |
| Patient nonadherence                                 | 89 (53)         | 6 (32)     |
| Other                                                | 39 (23)         | 1 (5)      |
| <b>Patients with dose interruption, <i>n</i> (%)</b> | 28 (78)         | 27 (75)    |
| <b>No. of dose interruptions, <i>n</i> (%)</b>       |                 |            |
| 1                                                    | 10 (28)         | 7 (19)     |
| 2                                                    | 3 (8)           | 6 (17)     |
| ≥ 3                                                  | 15 (42)         | 14 (39)    |
| <b>Dose interruptions, <i>n</i></b>                  | 106             | 129        |
| <b>Reasons for dose interruption, <i>n</i> (%)</b>   |                 |            |
| Adverse events                                       | 71 (67)         | 56 (43)    |
| Patient noncompliance                                | 22 (21)         | 48 (37)    |
| Other                                                | 13 (12)         | 25 (19)    |

<sup>a</sup> Periods of dose interruption (zero doses between periods of nonzero doses) are counted in the calculation of average daily dose.

**Supplementary Table S3.** Adverse events leading to treatment discontinuation or dose modification

| <b>AEs, n (%)<sup>a</sup></b>                  | <b>(n = 36)<br/>Any Grade</b> |
|------------------------------------------------|-------------------------------|
| <b>Leading to discontinuation</b>              | <b>6 (17)</b>                 |
| Dyspnea                                        | 2 (6)                         |
| Pleural effusion                               | 2 (6)                         |
| Nausea                                         | 1 (3)                         |
| Ejection fraction decreased                    | 1 (3)                         |
| Pneumonia                                      | 1 (3)                         |
| Acute kidney injury                            | 1 (3)                         |
| Aspiration                                     | 1 (3)                         |
| Conjunctivitis                                 | 1 (3)                         |
| Diverticulitis                                 | 1 (3)                         |
| Peripheral edema                               | 1 (3)                         |
| Esophageal stenosis                            | 1 (3)                         |
| Paralysis recurrent laryngeal nerve            | 1 (3)                         |
| Pericardial effusion                           | 1 (3)                         |
| Pneumonia necrotizing                          | 1 (3)                         |
| Rhabdomyolysis                                 | 1 (3)                         |
| <b>Leading to dose interruption</b>            | <b>18 (50)</b>                |
| Pyrexia                                        | 5 (14)                        |
| Pneumonia                                      | 3 (8)                         |
| Chills                                         | 2 (6)                         |
| AST increased                                  | 2 (6)                         |
| Ejection fraction decreased                    | 2 (6)                         |
| Neutrophil count decreased                     | 2 (6)                         |
| Leukopenia                                     | 2 (6)                         |
| Nausea                                         | 1 (3)                         |
| Fatigue                                        | 1 (3)                         |
| Neutropenia                                    | 1 (3)                         |
| ALT increased                                  | 1 (3)                         |
| Rash maculopapular                             | 1 (3)                         |
| Vision blurred                                 | 1 (3)                         |
| Anemia                                         | 1 (3)                         |
| Urinary tract infection                        | 1 (3)                         |
| Asthenia                                       | 1 (3)                         |
| Atrial fibrillation                            | 1 (3)                         |
| Blood AP increased                             | 1 (3)                         |
| Pulmonary embolism                             | 1 (3)                         |
| Wound infection                                | 1 (3)                         |
| Back pain                                      | 1 (3)                         |
| Clavicle fracture                              | 1 (3)                         |
| Dizziness                                      | 1 (3)                         |
| Facial nerve disorder                          | 1 (3)                         |
| Femoral neck fracture                          | 1 (3)                         |
| Hallucination                                  | 1 (3)                         |
| Hyperglycemic hyperosmolar nonketotic syndrome | 1 (3)                         |
| Hypotension                                    | 1 (3)                         |
| Oral candidiasis                               | 1 (3)                         |
| Pelvic infection                               | 1 (3)                         |
| Pleural effusion                               | 1 (3)                         |
| Pneumonia aspiration                           | 1 (3)                         |

|                                  |                |
|----------------------------------|----------------|
| Pulmonary hematoma               | 1 (3)          |
| Rib fracture                     | 1 (3)          |
| Skin lesion                      | 1 (3)          |
| Syncope                          | 1 (3)          |
| Weight decreased                 | 1 (3)          |
| <b>Leading to dose reduction</b> | <b>17 (47)</b> |
| Pyrexia                          | 6 (17)         |
| Fatigue                          | 2 (6)          |
| Neutrophil count decreased       | 2 (6)          |
| Ejection fraction decreased      | 2 (6)          |
| Pneumonia                        | 2 (6)          |
| Pneumonitis                      | 2 (6)          |
| WBC count decreased              | 2 (6)          |
| Chills                           | 1 (3)          |
| Headache                         | 1 (3)          |
| Peripheral edema                 | 1 (3)          |
| ALT increased                    | 1 (3)          |
| Neutropenia                      | 1 (3)          |
| Pruritus                         | 1 (3)          |
| Blood creatinine increased       | 1 (3)          |
| Dermatitis acneiform             | 1 (3)          |
| Fungal infection                 | 1 (3)          |
| Cystitis                         | 1 (3)          |
| Dyspepsia                        | 1 (3)          |
| Erythema                         | 1 (3)          |
| Hyponatremia                     | 1 (3)          |
| Pleural effusion                 | 1 (3)          |
| Proteinuria                      | 1 (3)          |

AE, adverse event; ALT, alanine aminotransferase; AP, alkaline phosphatase; AST, aspartate aminotransferase; ATC, anaplastic thyroid cancer; WBC, white blood cell.

<sup>a</sup> All-cause AEs of any grade leading to dose interruptions, dose reductions, or discontinuations of any drug in the ATC cohort.

**Supplementary Table S4.** Time to adverse event–related discontinuation of study treatment

| <b>Patient</b> | <b>Study Time to Dabrafenib Discontinuation, months</b> | <b>Study Time to Trametinib Discontinuation, months</b> |
|----------------|---------------------------------------------------------|---------------------------------------------------------|
| 1              | 43.2                                                    | 22.0                                                    |
| 2              | 5.3                                                     | 2.1                                                     |
| 3              | 1.8                                                     | 1.8                                                     |
| 4              | 1.4                                                     | 1.4                                                     |
| 5              | 6.4                                                     | 6.4                                                     |
| 6              | 5.2                                                     | 5.2                                                     |
